# Supplementary material
Source: publisher site journal article supplement (https://static.cambridge.org/content/id/urn:cambridge.org:id:article:S0954579423000378/resource/name/S0954579423000378supp001.docx)
Supplement: Supplementary file 1 [file S0954579423000378supp001.docx]

| **Supplementary Materials** Table 1. Correlations among all study variables. | | | | | | | | | | | | | | | | | | | | | | | |
| --- | --- | --- | --- | --- | --- | --- | --- | --- | --- | --- | --- | --- | --- | --- | --- | --- | --- | --- | --- | --- | --- | --- | --- |
|  | 1 | 2 | 3 | 4 | 5 | 6 | 7 | 8 | 9 | 10 | 11 | 12 | 13 | 14 | 15 | 16 | 17 | 18 | 19 | 20 | 21 | | 22 | | | 23 | |  | | | 25 | | | 26 | | |  | | |  | | |  | | |  | | | 31 | | |
| 1. Maternal depression age 3 | - |  |  |  |  |  |  |  |  |  |  |  |  |  |  |  |  |  |  |  | |  | | |  | |  | | |  | | |  | | |  | | |  | | |  | | |  | | |  | | |  | | |
| 1. Maternal depression age 6 | .51** | - |  |  |  |  |  |  |  |  |  |  |  |  |  |  |  |  |  |  | |  | | |  | |  | | |  | | |  | | |  | | |  | | |  | | |  | | |  | | |  | | |
| 1. Maternal depression age 9 | .44** | .44** | - |  |  |  |  |  |  |  |  |  |  |  |  |  |  |  |  |  | |  | | |  | |  | | |  | | |  | | |  | | |  | | |  | | |  | | |  | | |  | | |
| 1. Maternal depression age 12 | .47** | .58** | .59** | - |  |  |  |  |  |  |  |  |  |  |  |  |  |  |  |  | |  | | |  | |  | | |  | | |  | | |  | | |  | | |  | | |  | | |  | | |  | | |
| 1. Maternal depression age 15 | .40** | .48** | .57** | .59** | - |  |  |  |  |  |  |  |  |  |  |  |  |  |  |  | |  | | |  | |  | | |  | | |  | | |  | | |  | | |  | | |  | | |  | | |  | | |
| 1. Child irritability age 3 | .16** | .18** | .19** | .19** | .27** | - |  |  |  |  |  |  |  |  |  |  |  |  |  |  | |  | | |  | |  | | |  | | |  | | |  | | |  | | |  | | |  | | |  | | |  | | |
| 1. Child irritability age 6 | .10* | .15** | .20** | .12* | .21** | .51** | - |  |  |  |  |  |  |  |  |  |  |  |  |  | |  | | |  | |  | | |  | | |  | | |  | | |  | | |  | | |  | | |  | | |  | | |
| 1. Child irritability age 9 | .22** | .15** | .22** | .26** | .21** | .39** | .49** | - |  |  |  |  |  |  |  |  |  |  |  |  | |  | | |  | |  | | |  | | |  | | |  | | |  | | |  | | |  | | |  | | |  | | |
| 1. Child irritability age 12 | .20** | .14** | .27** | .34** | .33** | .37** | .46** | .58** | - |  |  |  |  |  |  |  |  |  |  |  | |  | | |  | |  | | |  | | |  | | |  | | |  | | |  | | |  | | |  | | |  | | |
| 1. Child irritability age 15 | .29** | .19** | .30** | .30** | .34** | .31** | .34** | .45** | .56** | - |  |  |  |  |  |  |  |  |  |  | |  | | |  | |  | | |  | | |  | | |  | | |  | | |  | | |  | | |  | | |  | | |
| 1. Child depression age 3 | .25** | .19** | .20** | .26** | .21** | .49** | .30** | .32** | .24** | .23** | - |  |  |  |  |  |  |  |  |  | |  | | |  | |  | | |  | | |  | | |  | | |  | | |  | | |  | | |  | | |  | | |
| 1. Child depression age 6 | .15** | .22** | .29** | .23** | .26** | .25** | .44** | .24** | .22** | .17** | .35** | - |  |  |  |  |  |  |  |  | |  | | |  | |  | | |  | | |  | | |  | | |  | | |  | | |  | | |  | | |  | | |
| 1. Child depression age 9 | .19** | .15** | .25** | .28** | .26** | .27** | .37** | .53** | .35** | .27** | .35** | .42** | - |  |  |  |  |  |  |  | |  | | |  | |  | | |  | | |  | | |  | | |  | | |  | | |  | | |  | | |  | | |
| 1. Child depression age 12 | .21** | .23* | .20** | .37** | .31** | .22** | .27** | .37** | .52** | .35** | .28** | .23** | .49** | - |  |  |  |  |  |  | |  | | |  | |  | | |  | | |  | | |  | | |  | | |  | | |  | | |  | | |  | | |
| 1. Child depression age 15 | .25** | .26** | .25** | .24** | .32** | .21** | .22** | .22** | .32** | .45** | .20** | .27** | .44** | .55** | - |  |  |  |  |  | |  | | |  | |  | | |  | | |  | | |  | | |  | | |  | | |  | | |  | | |  | | |
| 1. Child anxiety age 3 | .18** | .14** | .16** | .20** | .18** | .43** | .27** | .27** | .19** | .15** | .56** | .33** | .29** | .22** | .09 | - |  |  |  |  | |  | | |  | |  | | |  | | |  | | |  | | |  | | |  | | |  | | |  | | |  | | |
| 1. Child anxiety age 6 | .16** | .15** | .15** | .19** | .17** | .31** | .38** | .25** | .24** | .15** | .31** | .53** | .33** | .20** | .19** | .47** | - |  |  |  | |  | | |  | |  | | |  | | |  | | |  | | |  | | |  | | |  | | |  | | |  | | |
| 1. Child anxiety age 9 | .26** | .15** | .21** | .25** | .18** | .31** | .29** | .51** | .33** | .21** | .32** | .31** | .56** | .34** | .29** | .35** | .49** | - |  |  | |  | | |  | |  | | |  | | |  | | |  | | |  | | |  | | |  | | |  | | |  | | |
| 1. Child anxiety age 12 | .21** | .11* | .16** | .27** | .21** | .19** | .17** | .26** | .37** | .23** | .16** | .21** | .32** | .47** | .37** | .22** | .36** | .58** | - |  | |  | | |  | |  | | |  | | |  | | |  | | |  | | |  | | |  | | |  | | |  | | |
| 1. Child anxiety age 15 | .16** | .23** | .27** | .24** | .26** | .24** | .16** | .22** | .29** | .37** | .17** | .22** | .31** | .48** | .52** | .21** | .28** | .42** | .62** | - | |  | | |  | |  | | |  | | |  | | |  | | |  | | |  | | |  | | |  | | |  | | |
| 1. Child sex | .08 | .00 | .08 | .00 | .04 | .06 | -.01 | -.10* | -.04 | .01 | .02 | -.05 | -.07 | -.15** | .04 | -.03 | -.15** | -.07 | .00 | .05 | | - | | |  | |  | | |  | | |  | | |  | | |  | | |  | | |  | | |  | | |  | | |
| 1. Parental education | -.14** | -.10* | -.02 | -.08 | -.05 | -.05 | -.10* | -.09* | -.04 | -.03 | -.10* | -.15** | -.08 | -.04 | -.04 | -.10* | -.10* | -.12** | .01 | -.01 | | -.05 | | | - | |  | |  | | |  | | |  | | |  | | |  | | |  | | |  | | |  | | |
| 1. Child race/ethnicity | -.01 | .12* | .16** | .08 | .09 | .00 | .02 | -.05 | -.03 | -.01 | -.03 | .05 | -.02 | -.03 | -.02 | .07 | -.01 | -.03 | -.06 | -.03 | | -.04 | | | -.15** - | |  | | |  | | |  | | |  | | |  | | |  | | |  | | |  | | |  | | |

*Notes:* Maternal depressive symptoms were assessed using the Diagnostic Inventory of Depression (DID) self-report scale. Child depressive symptoms, anxiety symptoms and irritability symptoms were assessed using the parent-report Child Behavior Checklist (CBCL). Child sex coded: as 1=male 2=female. Parental education coded: 0= neither parent with 4-year college degree 1= at least one parent with a 4-year college degree. Child race/ethnicity coded: 0=White/non-Hispanic, 1=non-White/Hispanic.

** p* < .05, ** *p* < .01
